# Supplementary material for: Unpacking the layers: a meta-ethnography of cancer survivors’ loneliness
Source: Springer Nature journal article supplement (doi:10.1007/s11764-018-0724-6), 2018-11-09
Supplement: MOESM1 [file 16262200]

*Appendix.* Summary of Findings

| **Citation** | **Country** | **Sample Characteristics (age, gender, race, primary cancer site, time since diagnosis or active treatment)** | **Theory/Method/Analysis** | **Key Findings/Concepts** |
| --- | --- | --- | --- | --- |
| Albornoz CR, Pusic AL, Reavey P, Scott AM, Klassen AF, Cano SJ, Cordeiro PG, Matros E. Measuring health-related quality of life outcomes in head and neck reconstruction. Clinical Plastic Surgery. 2013; 40(2): 341-349. doi:10.1016/j.cps.2012.10.008. | United States | N= 26; 18-80 years; Male (12); White (15), “Other” (11); Head and neck; participants were 6 weeks to 7 years since surgery | Qualitative interviews. Constant comparison | Facial alternations from the disease create psychosocial distress that can lead to social isolation and changes in self-esteem and intimate relationships. |
| Boydell KM, Stasiulis E, Greenberg M, Greenberg C, Spiegler B. I'll show them: The social construction of (in)competence in survivors of childhood brain tumors. J Pediatr Oncol Nurs. 2008; 25(3): 164-74. doi: 10.1177/1043454208315547. | Canada | N= 14 childhood cancer survivors & 22 family members; Aged 17-29 years, Mainly White, 3 families of Chinese, East Indian, and Filipino descent; Brain; participants were childhood survivors with no time identified since active treatment | Interviews & focus groups, Qualitative analysis | The struggle to cope with contradictory concepts (i.e. integration/isolation) among childhood cancer survivors in an attempt to feel competent in their individual identities and agencies. |
| Foley KL, Farmer DF, Petronis VM, Smith RG, McGraw S, Smith K, Carver CS, Avis N. A qualitative exploration of the cancer experience among long-term survivors: Comparisons by cancer type, ethnicity, gender, and age. Psychooncology. 2006; 15: 248-258. doi: 10.1002/pon.942 | United States | N= 58, Female= 32; Black (9), Hispanic (8), White (41), Bladder, Breast, Colorectal, Gynecological, Head and neck; Prostate; participants were a minimum of 5 years since diagnosis (mean 7.7 years since diagnosis) | Semi-structured interviews | Highlighted how long-term cancer survivors incorporate their experience of cancer into their lives. Individuals experiencing social isolation reported lower quality of life. |
| Gray RE, James P, Manthorne J, Gould J, Fitch MI. A consultation with Canadian rural women with breast cancer. Health Expect. 2003; 7: 40-50. doi: 10.1046/j.1369-6513.2003.00248.x. | Canada | N= 276 women; 72% of participants aged 50 years or older; White (86%), Other (14%), Breast; 29% of participants were 2 years or less since diagnosis; 42% were 2-6 years since diagnosis; and 29% were 6+ years since diagnosis | Focus groups, Thematic analysis | Survivors living in rural settings have difficulty accessing information related to their health. They also reported experiencing social isolation. |
| Halldorsdottir S, Hamrin E. Experiencing existential changes: The lived experience of having cancer. Cancer Nurs. 1996; 19: 29-36. | Iceland | N= 9; Males (4); 38-69 years; Breast, Skin, Intestine, Ovarian, Cervix, Prostate; selected participants had to be in the post-treatment phase; 2 participants had “been dealing with cancer within a 2-year time” and 2 “were dealing with cancer 4 and 6 years ago.” | Phenomenological analysis | Survivors reported existential concerns including isolation, vulnerability, and uncertainty. |
| Hauken MA, Larsen TMB, Holsen I. Meeting reality: Young adult cancer survivors' experiences reentering everyday life after cancer treatment. Cancer Nurs. 2013; 36(5): 17-26. doi: 10.1097/NCC.0b013e318278d4fc. | Norway | N= 20; 24-35 years; Male (5); Lymphoma, Gynecologic, Breast, Testes, Colon, Sarcoma, Head and neck; participants had finished cancer treatment within the last 5 years | Phenomenological meaning condensation | Young adult cancer survivors report experiences of reentering life and difficulties associated with isolation and being “neither sick nor healthy” after treatment. |
| Howard AF, Tan de Bibiana J, Smillie K, Goddard K, Pritchard S, Olson R, Kazanjian A. Trajectories of social isolation in adult survivors of childhood cancer. J Cancer Surviv. 2014; 8(1): 80-93. doi: 10.1007/s11764-013-0321-7. | Canada | N= 30; 22-43 years; Leukemia, Brain, Sarcoma; participants were 9 to 38 years (mean 22 years) since diagnosis | Constant comparative analysis | Survivors of childhood cancer express changes in social isolation over time. |
| Jefferies H, Coldfield S, Clifford C. Aloneness: The lived experience of women with cancer of the vulva. Eur J Cancer Care. 2011; 20: 738-46. doi: 10.1111/j.1365-2354.2011.01246. | United Kingdom | N= 13 women; 27-53 years; White; Vulva; participants ranged from 6 months to 3 years 3 months since surgery | Semi-structured interviews | Concept of aloneness experienced by the women included sense of isolation, separation, and loss of sexual functioning. |
| Konradsen H, Kirkevold M, McCallin A, Caye-Thomasen P, Zoffman V. Breaking the silence: Integration of facial disfigurement after surgical treatmetn for cancer. Qual Health Res. 2012; 22(8): 1037-46. doi: 10.1177/1049732312448545. | Denmark | N= 12; 25-78 years; Male (6); Head, Neck, or Eye; participants completed three interviews within one year after surgery | Grounded theory analysis | The primary concern among individuals with facial disfigurement after surgical procedures was feelings of isolation. |
| Lagerdahl AS, Moynihan M, Stollery B. An exploration of existential experiences of patients following curative treatment for cancer: Reflections from a U.K. sample. J Psychosoc Oncol. 2014; 32(5): 555-75. doi: 10.1080/07347332.2014.936647. | United Kingdom | N= 8; 43-62 years; White; Prostate, Breast, Skin, Lung, and Head and Neck; participants had a mean of 8 months since treatment ended (range 2-12 months) | Semi-structured interviews, Thematic analysis | Existential reflections following the completion of curative treatment included death anxiety, isolation, freedom, and meaning making. |
| Lee HY, Jin SW. Older Korean cancer survivors' depression and coping: Directions toward culturally competent interventions. J Psychosoc Oncol. 2013; 31(4): 357-76. doi: 10.1080/07347332.2013.798756. | United States | N= 24; 55-89 years; Male (7) Korean immigrants; Breast, Stomach, Colorectal, Cervical, Prostate; participants were required to have completed cancer treatment with a mean “cancer survival years” of 10.9 (SD = 9.9). | Qualitative method | Among older Korean immigrants, depression was linked to fears of death, loneliness, and bodily changes. |
| Llyod PA, Briggs EV, Kane N, Jeyarajah AR, Shepherd JH. Women's experiences after a radical vaginal trachelectomy for early stage cervical cancer. A descriptive phenomenological study. Eur J of Oncol Nurs. 2014; 18: 362-71. doi: 10.1016/j.ejon.2014.03.014. | United Kingdom | N= 12 Women; 29-45 years; Cervical; participants were 1-10 years since surgery. | Phenomenological analysis | Women expressed feelings of social isolation as well as a desire to connect with similar peers. |
| McGrath P, Patterson C, Yates P, Treloar S, Oldenburg B, Loos C. A study of postdiagnosis breast cancer concerns for women living in rural and remote Queensland. Part I: Personal concerns. Aust J Rural Health. 1999; 7(1): 34-42. doi: 10.1046/j.1440-1584.1999.00214.x. | Australia | N= 24 Women; 35 to over 65 years; Breast; 12 participants had been diagnosed within 2 years, 7 had been diagnosed 2-5 years ago, and 5 had been diagnosed more than 5 years ago | Structured interviews | Women reported a lack of social support, feelings of aloneness, and changes in their roles. |
| Moore KA, Ford PJ, Farah, CS."I have quality of life...but...": Exploring support needs important to quality of life in head and neck cancer. Eur J of Oncol Nurs.2014; 18: 192-200. doi: 10.1016/j.ejon.2013.10.010. | Australia | N= 8; 51-60 years; Head and Neck | Semi-structured interviews, Content analysis | Survivors experienced feelings of isolation after treatment was completed and they were away from the supportive care they received in the hospital. |
| Rosedale M. Survivor loneliness of women following breast cancer. Oncol Nurs Forum. 2009; 36(2): 175-183. doi: 10.1188/09.ONF.175-83. | United States | N= 13 Women; 33-74 years, African American (3) & Caucasian (10); Breast cancer | Phenomenological analysis | Described a unique type of loneliness among cancer survivors termed survivor loneliness. |
| Sekse RJT, Raaheim M, Blaaka G, Gjengedal E. Life beyond cancer: women's experienes 5 years after treatment for gynacological cancer. Scand J Caring Sci. 2010; 24(4). doi: 10.1111/j.1471-6712.2010.00778.x. | Norway | N= 16 Women; 39-66 years; Gynecological | Phenomenological- hermeneutical approach | Women expressed profound changes after treatment and described the process “as a lonesome journey.” |
| Semple CJ, Dunwoody L, Kernohan WG, McCaughan E, Sullivan K. Changes and challenges to patients' lifestyle patterns following treatment for head and neck cancer. J Adv Nurs. 2008; 63(1): 85-93. doi: 10.1111/j.1365-2648.2008.04698.x. | United Kingdom | N= 10; 31-61 years; Male (6); Head and neck | Semi-structured interviews, Thematic analysis | Survivors reported changes in interpersonal and social relationships. |
| Sinding C, Grassau P, Barnoff L. Community support, community values: The experiences of lesbians diagnosed with cancer. Women & Health. 2007; 44(2): 59-79. doi: 10.1300/J013v44n02_04. | Canada | N=26 women; 36-72 years; White, British Canadian, Jewish, Native Canadian, Metis-Ukrainian, Euro Canadian, Polish Canadian, Italian, Asian; 13 participants were diagnosed in the last 3 years and 13 were diagnosed more than 3 years ago | Participatory action model | Women identifying as lesbian experienced isolation and disconnection when fears of cancer, homophobia, and exclusion by the lesbian community were present. |
| Wagland K, Levesque JV, Connors J. Disease isolation: The challenges faced by mothers living with multiple myeloma in rural and regional Australia. Eur J Oncol Nurs. 2015; 19: 148-53. doi: 10.1016/j.ejon.2014.10.003. | Australia | N= 5 Women; Myeloma; participants were on average 5.2 years since diagnosis, and were excluded if they had been diagnosed in the last 12 months, were undergoing intensive treatment, or receiving palliative care | Phenomenological analysis | Women diagnosed with a rare cancer living in rural locations experience many types of isolation. |
| Wyatt G, Kurtz ME, Liken M. Breast cancer survivors: An exploration of quality of life issues. Cancer Nurs. 1993; 16(6): 440-48. | United States | N= 11 Women; 40-79 years; Breast; participants were a minimum of 5 years since diagnosis (range 5-14 years, mean 10 years) | Focus groups | Women expressed changes in social relationships. |
